# Supplementary material for: Increasing Mortality in Venovenous Extracorporeal Membrane Oxygenation for COVID-19–Associated Acute Respiratory Distress Syndrome
Source: PubMed Central journal article supplement — Crit Care Explor. 2022 Mar 4;4(3):e0655. doi: 10.1097/CCE.0000000000000655 (PMC8901198; doi:10.1097/cce.0000000000000655), 2022-03-04
Supplement: cc9-4-e0655-s001.pdf [file cc9-4-e0655-s001.pdf]

| Variables                           |                                               | Cohort 1 (N=49) | Cohort 2 (N=51)  | p-value          |
|-------------------------------------|-----------------------------------------------|-----------------|------------------|------------------|
| Age                                 | Median (N [IQR])                              | 53 (48-57)      | 52 (43-59)       | 0.73             |
| Sex (N [%])                         | Male                                          | 38 (83)         | 37 (69)          | 0.10             |
|                                     | Female                                        | 8 (17)          | 17 (31)          |                  |
| Race (N [%])                        | White                                         | 11 (24)         | 31 (57)          | <b>0.004</b>     |
|                                     | Latino                                        | 17 (37)         | 8 (15)           |                  |
|                                     | Black                                         | 10 (22)         | 5 (9)            |                  |
|                                     | Native American                               | 1 (2)           | 3 (6)            |                  |
|                                     | Asian                                         | 7 (15)          | 5 (9)            |                  |
|                                     | BMI (N [SD])                                  | Mean            | 30.4 (27.8-35.5) |                  |
| Medical History (N [%])             | Obesity                                       | 18 (39)         | 32 (59)          | <b>0.045</b>     |
|                                     | Hypertension                                  | 21 (46)         | 11 (20)          | <b>0.007</b>     |
|                                     | Hyperlipidemia                                | 13 (28)         | 15 (28)          | 0.96             |
|                                     | Diabetes                                      | 18 (39)         | 14 (26)          | 0.16             |
|                                     | Asthma/COPD                                   | 3 (7)           | 8 (15)           | 0.19             |
|                                     | CAD                                           | 3 (7)           | 4 (7)            | 0.86             |
|                                     | CKD                                           | 6 (13)          | 5 (9)            | 0.55             |
|                                     | OSA                                           | 6 (13)          | 4 (7)            | 0.35             |
| ECMO Location                       | Center #1                                     | 12 (26)         | 13 (24)          | 0.81             |
|                                     | Center #2                                     | 16 (35)         | 16 (30)          |                  |
|                                     | Center #3                                     | 9 (20)          | 10 (19)          |                  |
|                                     | Center #4                                     | 9 (20)          | 15 (28)          |                  |
|                                     | Transferred from Referral Hospital            | 27 (59)         | 44 (81)          |                  |
| Ventilator Settings (Average [STD]) | FiO2                                          | 89.0 (14.4)     | 92.1 (13.7)      | 0.28             |
|                                     | PEEP                                          | 13.7 (3.4)      | 12.4 (2.9)       | <b>0.046</b>     |
|                                     | Respiratory Rate                              | 25.9 (6.3)      | 23.8 (7.5)       | 0.17             |
|                                     | Tidal Volume                                  | 281.4 (181.7)   | 362.5 (101.5)    | <b>0.017</b>     |
|                                     | Peak Pressure                                 | 34.2 (5.0)      | 32.2 (6.4)       | 0.24             |
|                                     | Plateau Pressure                              | 30.0 (4.4)      | 29.8 (6.2)       | 0.88             |
| Arterial Blood Gas (Average [STD])  | pH                                            | 7.3 (0.1)       | 7.3 (0.1)        | 0.22             |
|                                     | PCO2                                          | 62.2 (15.9)     | 64.2 (20.6)      | 0.61             |
|                                     | PaO2                                          | 56.5 (14.7)     | 57.1 (18.6)      | 0.87             |
|                                     | P/F Ratio                                     | 72.3 (22.7)     | 72.2341 (28.7)   | 0.99             |
| Novel Therapeutics (N [%])          | Hydroxychloroquine +/- Azithromycin           | 9 (20)          | 14 (26)          | 0.45             |
|                                     | Remdesivir                                    | 31 (67)         | 28 (52)          | 0.12             |
|                                     | IL-6 Inhibitor                                | 26 (57)         | 13 (24)          | <b>&lt;0.001</b> |
|                                     | Convalescent Plasma                           | 22 (48)         | 24 (44)          | 0.74             |
|                                     | Steroids                                      | 33 (72)         | 53 (98)          | <b>&lt;0.001</b> |
|                                     | Total Steroid Days (median [IQR])             | 6 (0-10)        | 11 (10-14)       | <b>&lt;0.001</b> |
| Renal Failure                       | Need for Renal Replacement (N [%])            | 21 (46)         | 28 (52)          | 0.54             |
|                                     | Total Renal Replacement, days (Average [STD]) | 21.9 (16.0)     | 21.9 (15.8)      | 1                |
| Transfusions (Average [SE])         | Total Units                                   | 11 (4-18)       | 11 (5-22)        | 0.9              |
| SOFA Score (Average [STD])          | Prior to ECMO Cannulation                     | 7 (6-8)         | 7 (2-8)          | 0.15             |
| ICU Treatments (N [%])              | Proned                                        | 41 (89)         | 48 (89)          | 0.97             |
|                                     | Paralyzed                                     | 42 (91)         | 49 (91)          | 0.92             |
|                                     | Vasopressor                                   | 33 (72)         | 35 (65)          | 0.46             |

**Supplemental Table 1: Demographic, clinical, and ICU data for Cohort 1 and Cohort 2. BMI = body mass index; COPD = chronic obstructive pulmonary disease; CAD = coronary artery disease; CKD = chronic kidney disease; OSA = obstructive sleep apnea; SOFA = sequential organ failure assessment score**
